# Supplementary material for: Emission Properties of Diblock Copolymers Composed of Poly(ethylene glycol) and Dense 1,2,3-Triazole Blocks
Source: MDPI journal article supplement (doi:10.3390/polym11071086), 2019-06-26
Supplement: s1 [file s1]

Supporting Information for

## **Emission Properties of Diblock Copolymers Composed of Poly(ethylene glycol) and Dense 1,2,3-Triazole Blocks**

**Yanqiong Yang <sup>1</sup>, Asami Mori <sup>1</sup> and Akihito Hashidzume <sup>1,\*</sup>**

<sup>1</sup> Department of Macromolecular Science, Graduate School of Science, Osaka University;

hashidzume@chem.sci.osaka-u.ac.jp

\* Correspondence: hashidzume@chem.sci.osaka-u.ac.jp; Tel.: +81-6-6850-8174

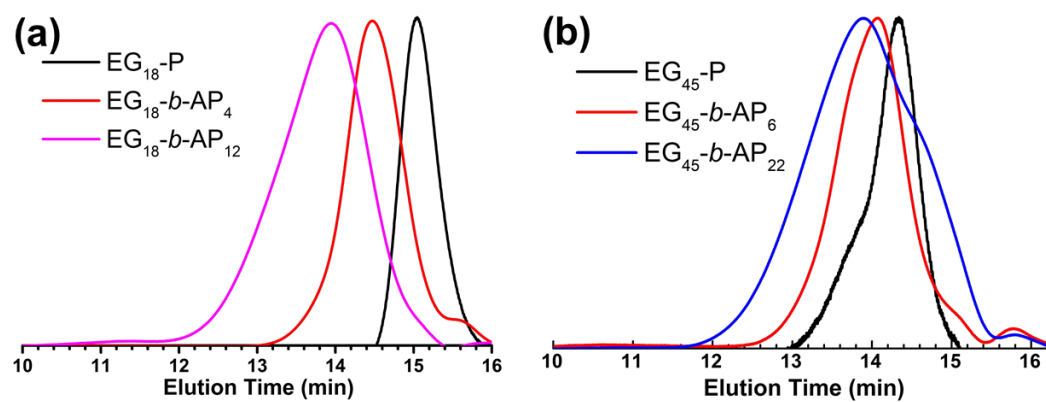

**Figure S1.** SEC analysis of EG<sub>m</sub>-P and EG<sub>m</sub>-b-AP<sub>n</sub> samples.

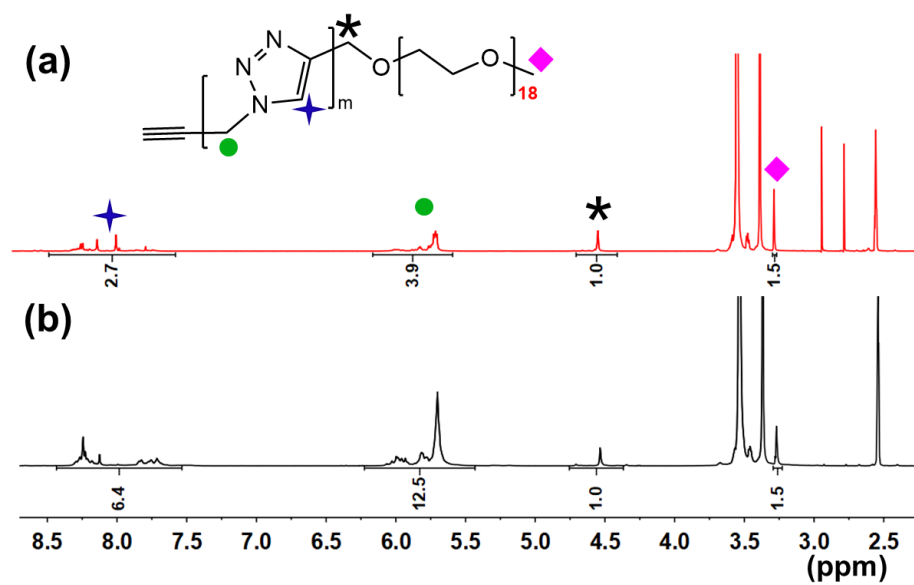

**Figure S2.**  $^1\text{H}$  NMR spectra of EG18-*b*-AP $n$  in DMSO- $d_6$  (500 MHz, 25  $^\circ\text{C}$ ).

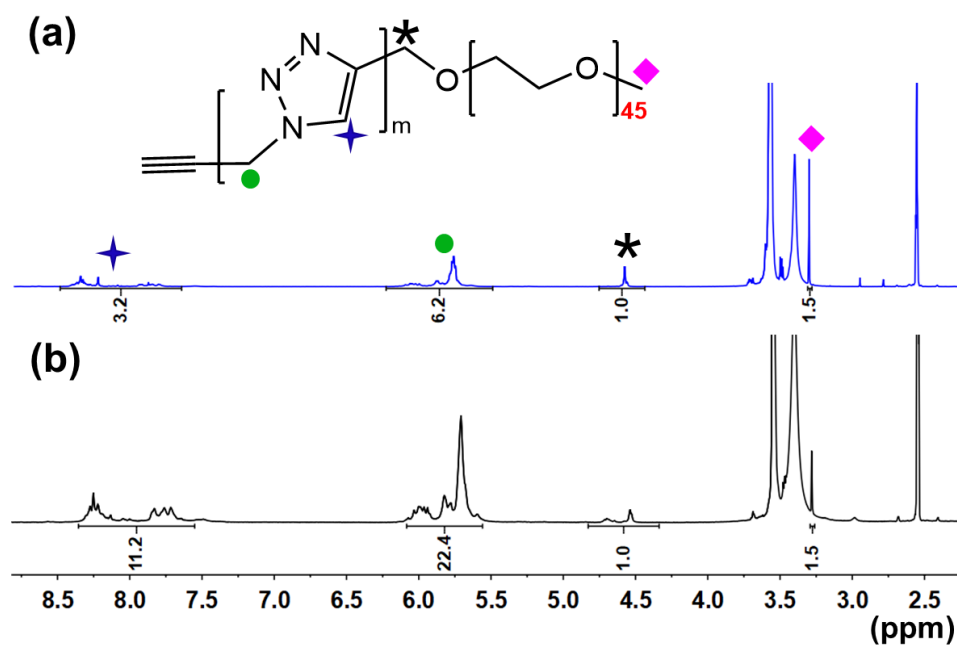

**Figure S3.**  $^1\text{H}$  NMR spectra of EG45-*b*-AP $n$  in DMSO- $d_6$  (500 MHz, 25  $^\circ\text{C}$ ).

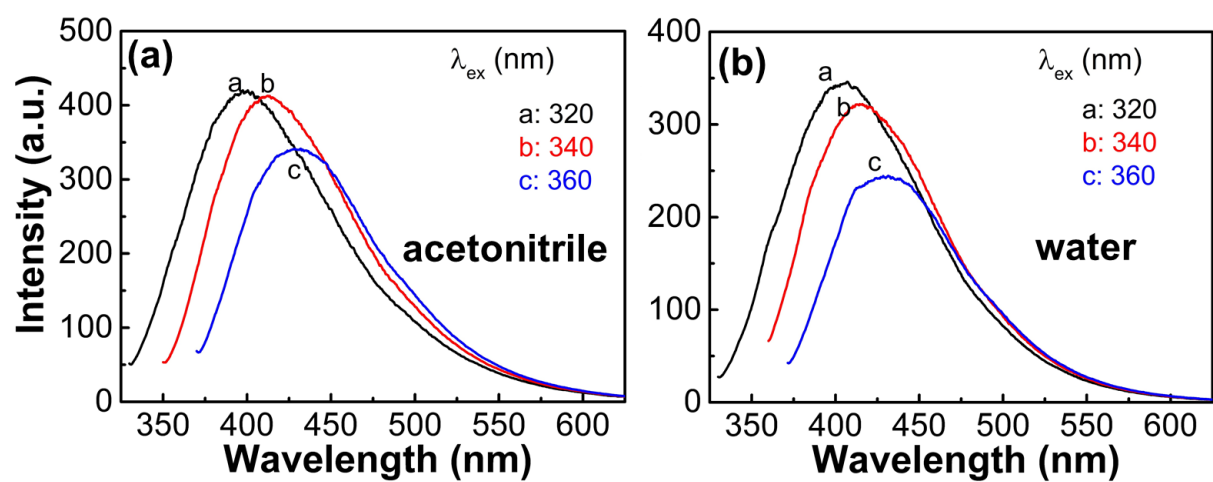

**Figure S4.** Steady-state fluorescence spectra for 1.0 g L<sup>-1</sup> solutions of EG18-*b*-AP4 in acetonitrile (a) and water (b).

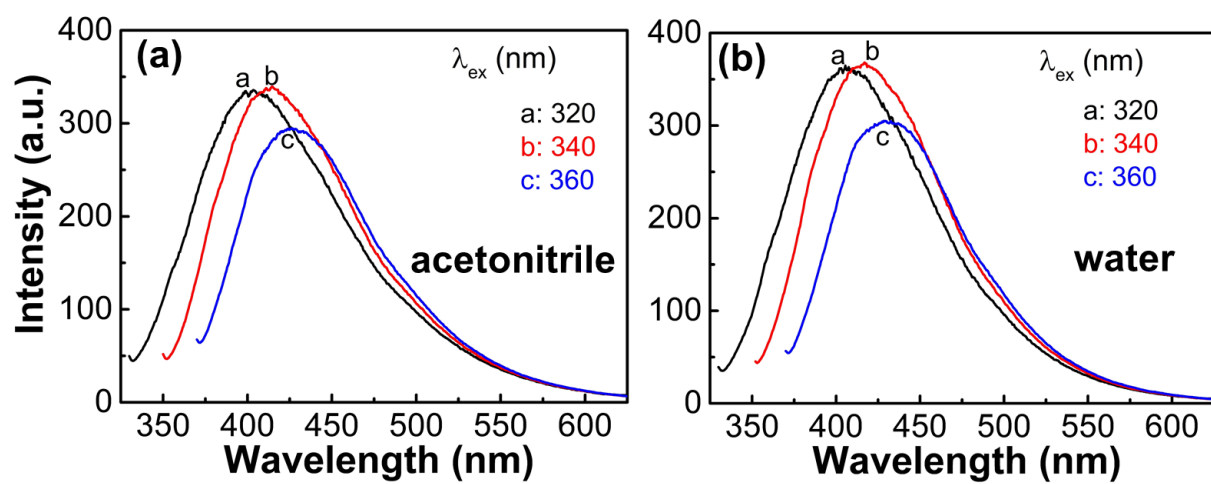

**Figure S5.** Steady-state fluorescence spectra for 1.0 g L<sup>-1</sup> solutions of EG45-*b*-AP6 in acetonitrile (a) and water (b).

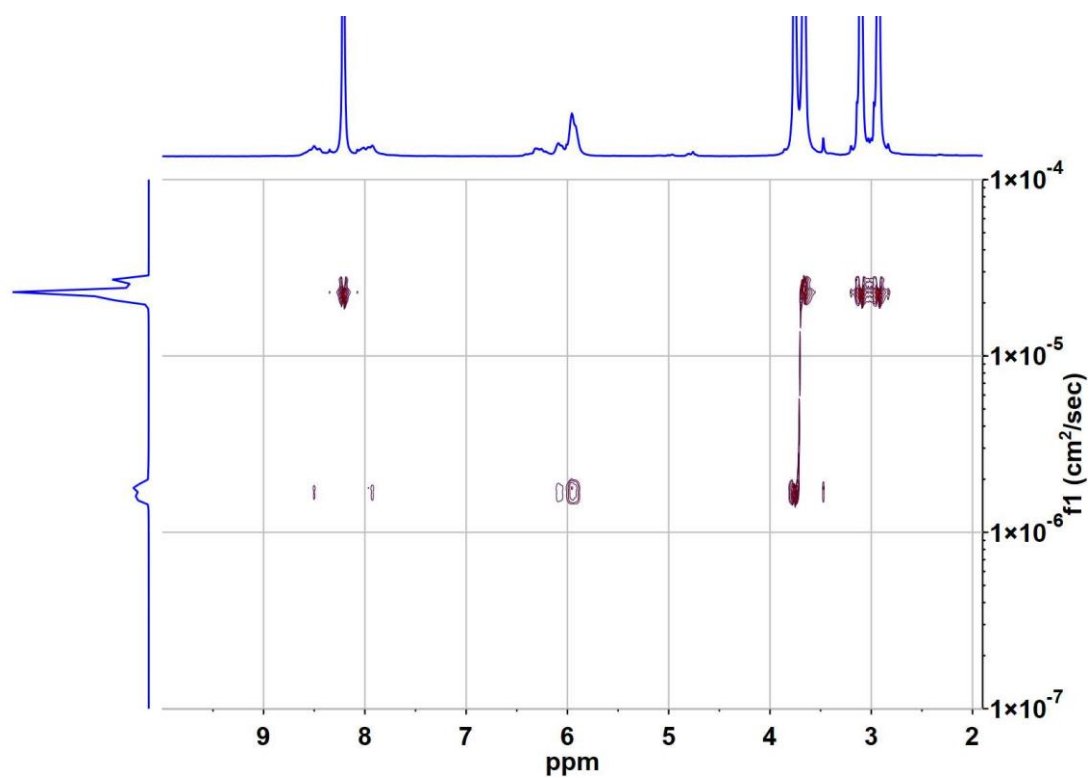

**Figure S6.** DOSY spectrum for a  $10.0 \text{ g L}^{-1}$  solution of EG45-*b*-AP22 in  $\text{DMF-}d_7$  at 298 K.
